# Supplementary material for: Sex differences of vascular brain lesions in patients with atrial fibrillation
Source: PubMed Central journal article supplement (PMC9472202; doi:10.1136/openhrt-2022-002033), 2022-09-13

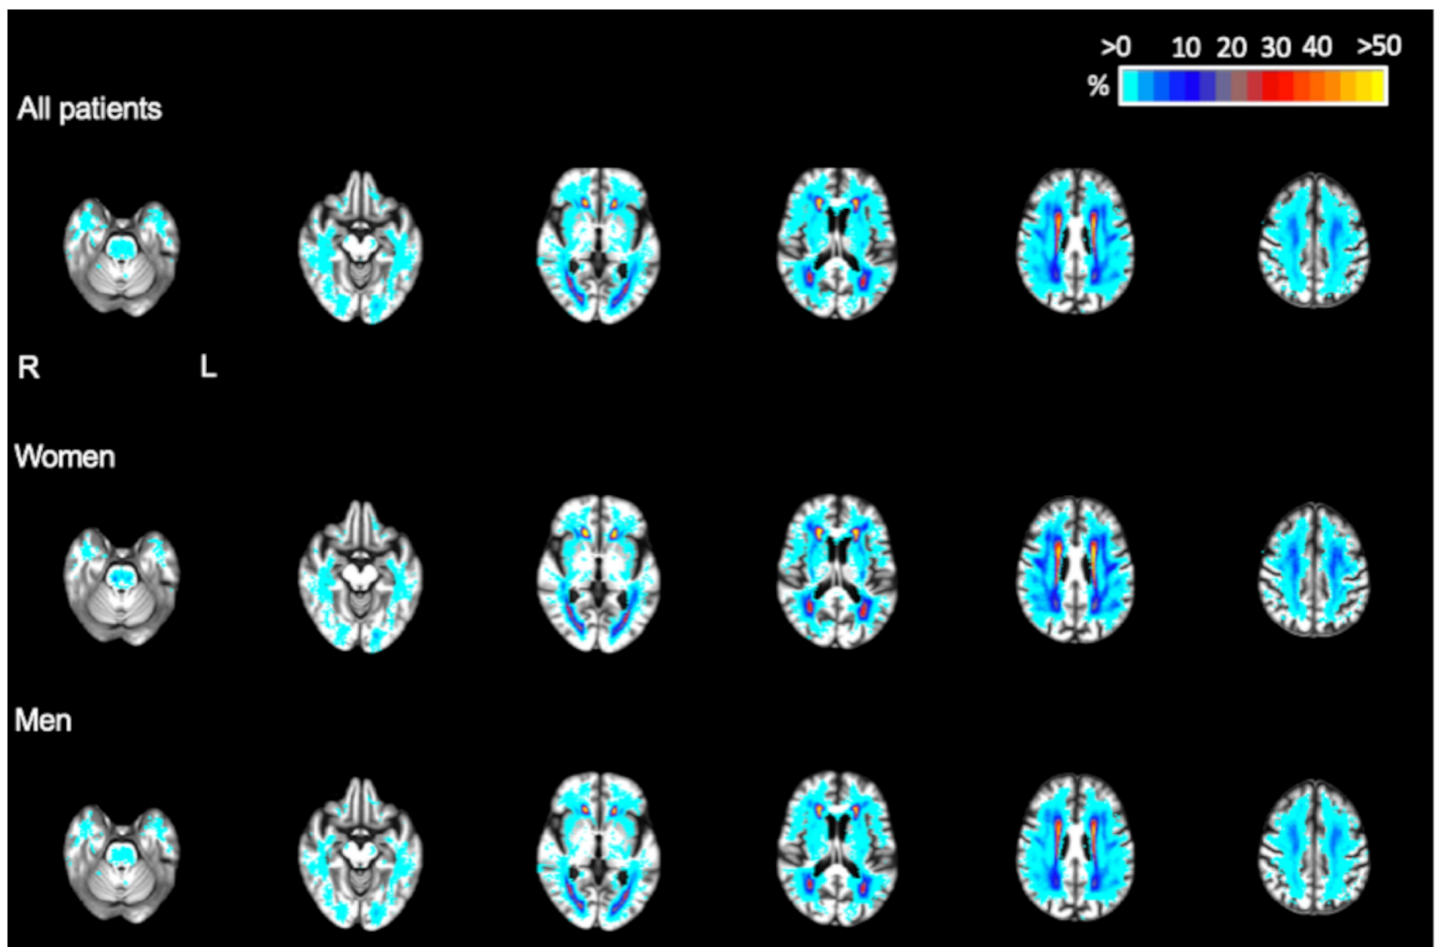

Supplement: openhrt-2022-002033supp002.pdf [file openhrt-2022-002033supp002.pdf]
